# Supplementary material for: Eukaryotic expression, purification and structure/function analysis of native, recombinant CRISP3 from human and mouse
Source: PubMed Central journal article supplement — Sci Rep. 2014 Feb 27;4:4217. doi: 10.1038/srep04217 (PMC3936225; doi:10.1038/srep04217), 2014-02-27
Supplement: srep04217-s1.pdf [file srep04217-s1.pdf]

Supplementary Information

**Eukaryotic expression, purification and structure/function analysis of native, recombinant CRISP3 from human and mouse**

Marianna Volpert<sup>1</sup>, Jonathan E. Mangum<sup>1</sup>, Duangporn Jamsai<sup>2</sup>, Rebecca D'Sylva<sup>2</sup>, Moira K O'Bryan<sup>2</sup>, Peter McIntyre<sup>3</sup>.

<sup>1</sup>Dept of Pharmacology, University of Melbourne, Parkville, VIC, Australia

<sup>2</sup>Dept of Anatomy and Developmental Biology, Monash University, Clayton, VIC, Australia

<sup>3</sup>Health Innovations Research Institute, RMIT University, Bundoora, VIC, Australia

Figure 2

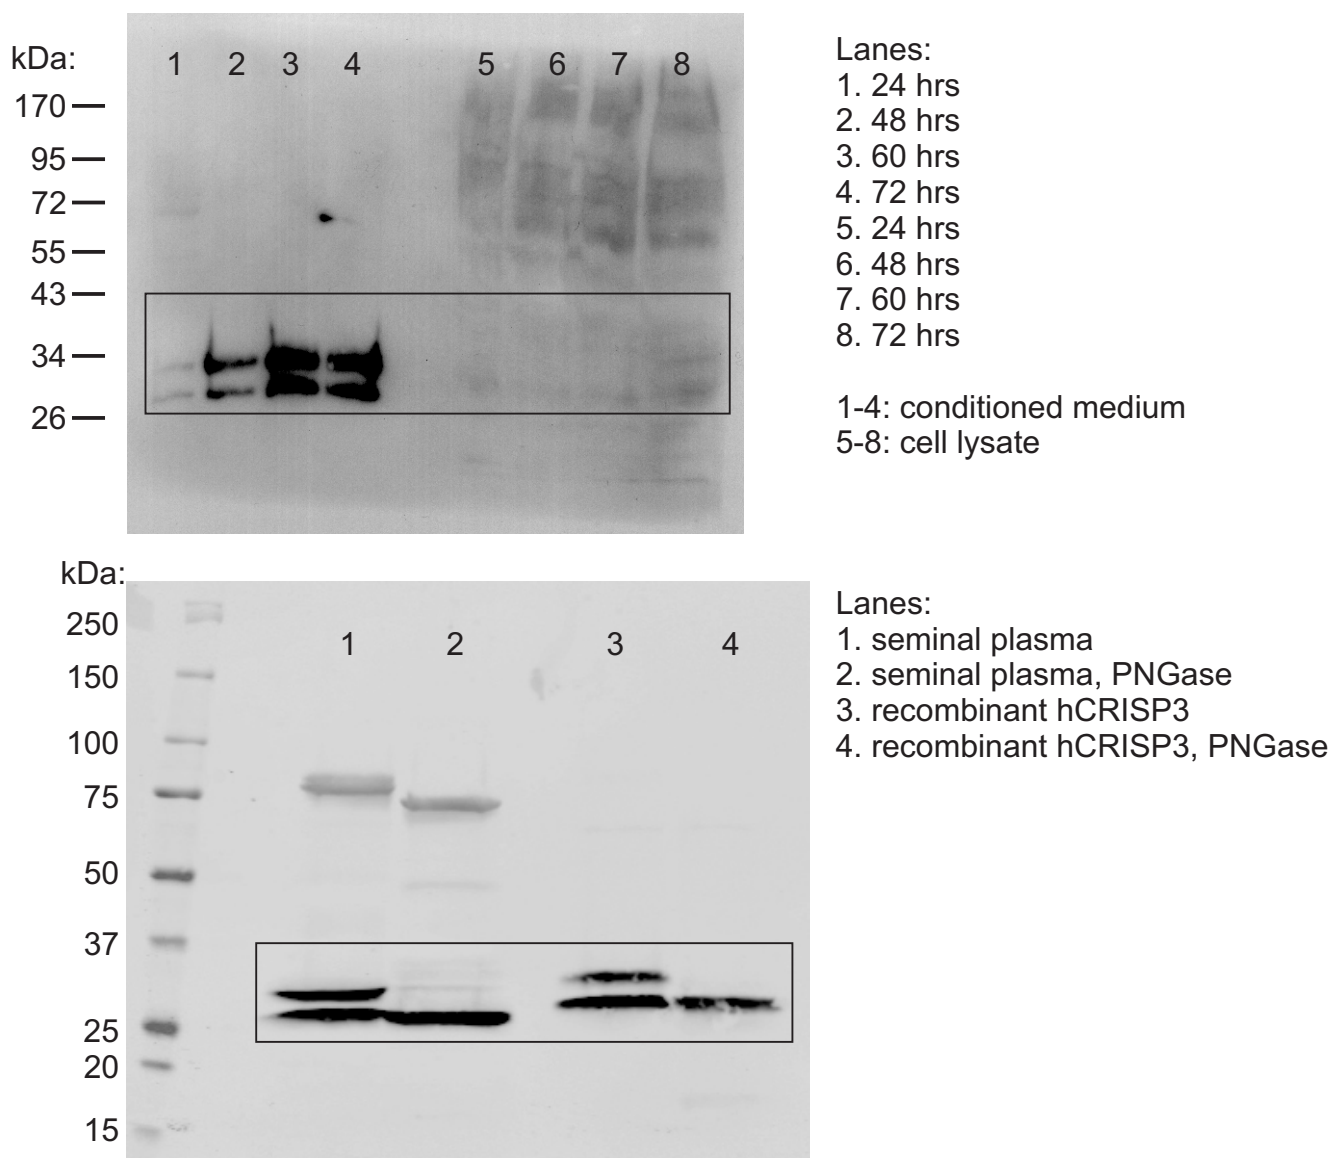

Figure 4

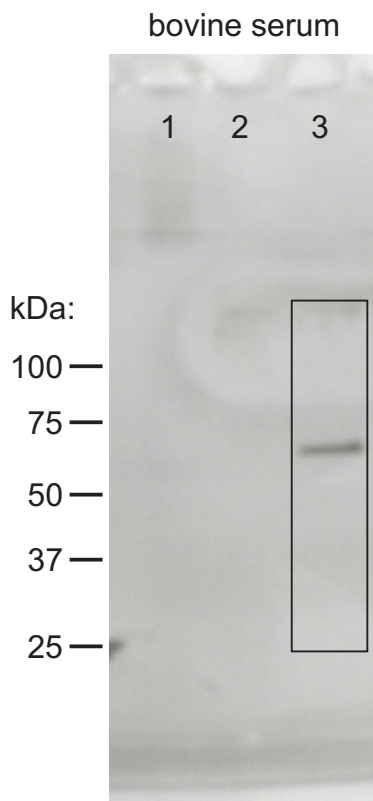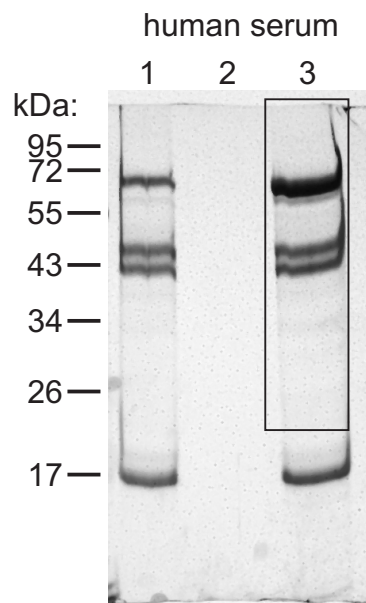

- Lanes:
1. Uncoated beads control elution
  2. PBS control elution
  3. CRISP3-coated beads, serum elution

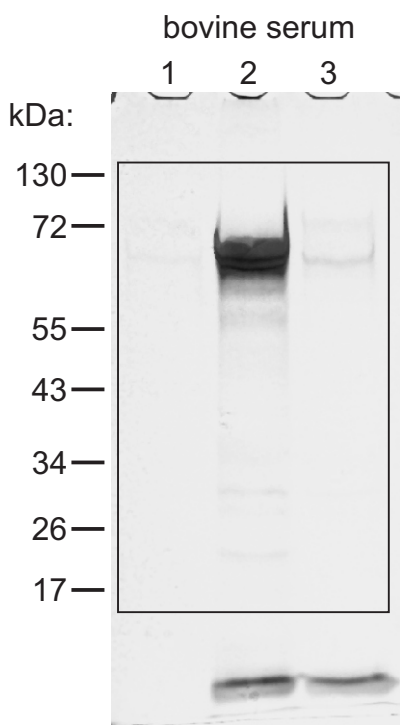

- Lanes:
1. No CRISP3 control
  2. Untreated CRISP3
  3. Denatured CRISP3

Figure 5

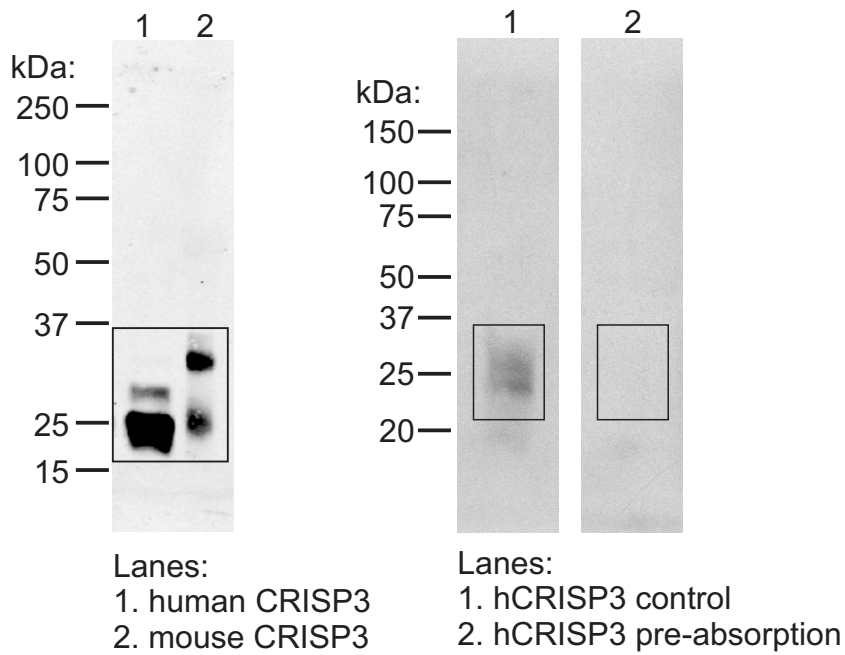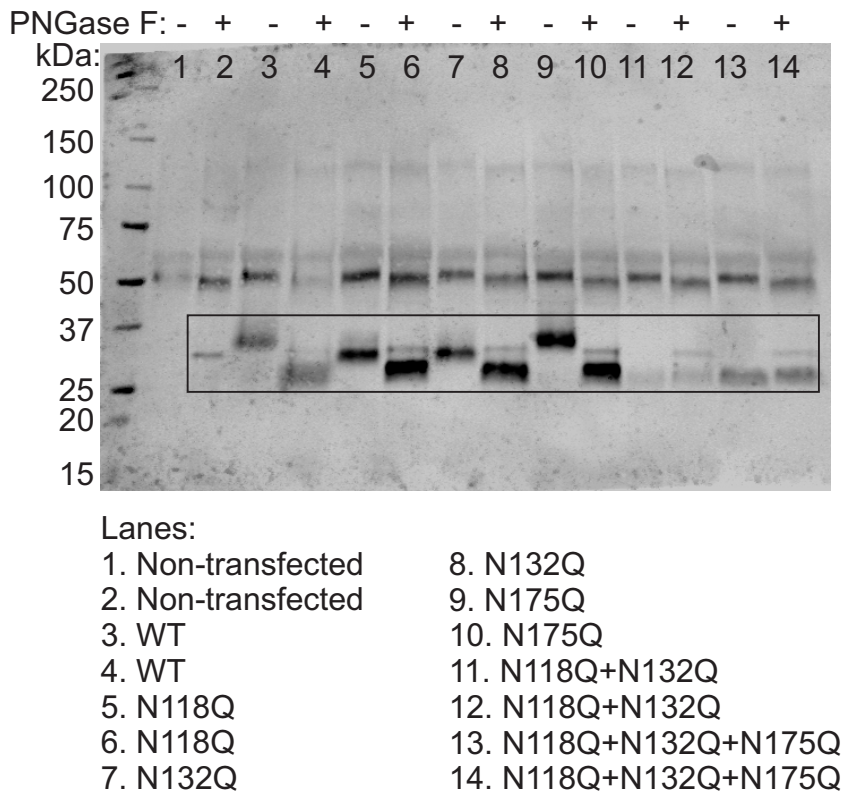

Figure 6

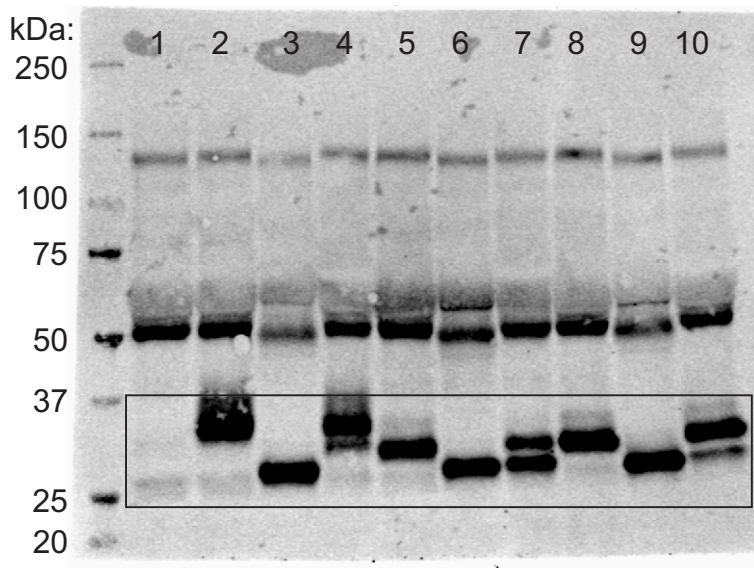

- Lanes:
1. Non-transfected
  2. mCRISP3 WT, untreated
  3. mCRISP3 WT, PNGase F
  4. mCRISP3 WT, Endo H
  5. mCRISP3 N118Q, untreated
  6. mCRISP3 N118Q, PNGase F
  7. mCRISP3 N118Q, Endo H
  8. mCRISP3 N132Q, untreated
  9. mCRISP3 N132Q, PNGase F
  10. mCRISP3 N132Q, Endo H

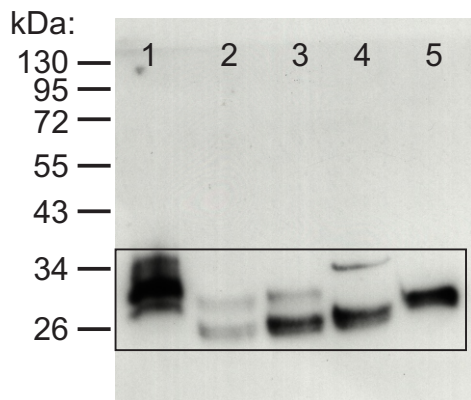

- Lanes:
1. mCRISP3, Endo H
  2. hCRISP3, untreated
  3. hCRISP3, Endo H
  4. hCRISP3, PNGase F
  5. hCRISP3-N239Q, untreated

Figure 7

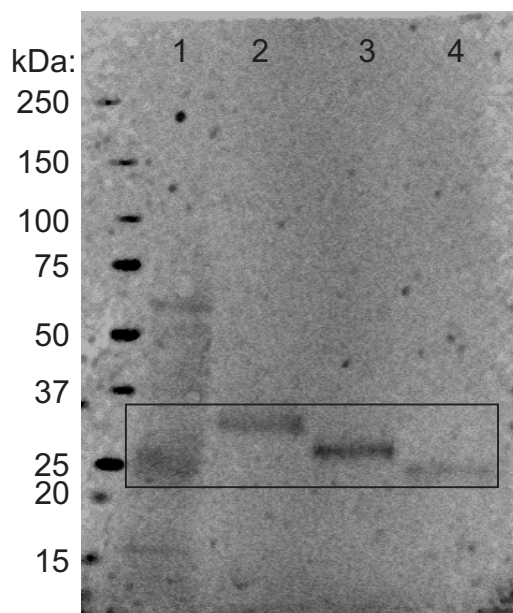

Lanes:

- 1. salivary gland mCRISP3
- 2. mCRISP3 WT
- 3. mCRISP3 N118Q
- 4. mCRISP3 N118Q+N132Q
